# Supplementary material for: Changes in oxidative stress parameters in healthy and diseased Holstein cows during the transition period in Yamagata Prefecture, Japan
Source: PubMed Central journal article supplement — J Vet Med Sci. 2020 Jun 8;82(7):955–61. doi: 10.1292/jvms.20-0024 (PMC7399317; doi:10.1292/jvms.20-0024), 2020-06-08
Supplement: jvms-82-955-s001.pdf [file jvms-82-955-s001.pdf]

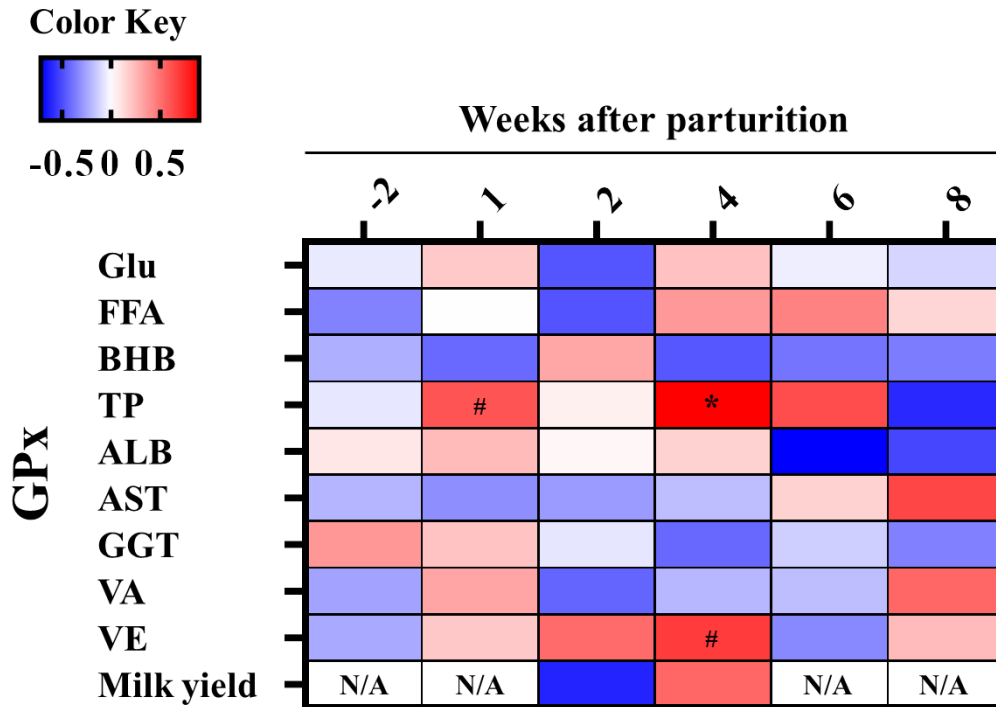

**Supplementary Fig. 1.** Correlation analysis between the glutathione peroxidase (GPx) activities and blood biochemical components (Glu; glucose, FFA; free fatty acid, BHB;  $\beta$ -hydroxybutyric acid, TP; total protein, ALB; albumin, AST; aspartate aminotransferase, GGT;  $\gamma$ -glutamyl transpeptidase, VA; vitamin A, VE; vitamin E) and milk yield in the transition control cows. \*# denote significant correlation ( $P < 0.05$ , and 0.1, respectively).
